# Supplementary material for: The structural diversity and photoluminescent properties of cadmium thiophenedicarboxylate coordination polymers
Source: Royal Society of Chemistry journal article supplement (doi:10.1039/c4dt00211c), 2014-01-01
Supplement: c4dt00211c1.pdf [file c4dt00211c1.pdf]

**Electronic Supplementary Information for**

**Structural Diversity and Photoluminescent Properties of  
Cadmium Thiophenedicarboxylate Coordination Polymers**

Li-Ping Xue,<sup>†</sup> Xin-Hong Chang,<sup>†</sup> Shi-Hui Li,<sup>†</sup> Lu-Fang Ma,<sup>\*,†</sup> and Li-Ya Wang<sup>\*,†,‡</sup>

<sup>†</sup>*College of Chemistry and Chemical Engineering, Luoyang Normal University, Luoyang 471022, P. R. China.*

<sup>‡</sup>*College of Chemistry and Pharmaceutical Engineering, Nanyang Normal University, Nanyang 473061, P. R.*

*China*

**Table S1** Crystal data and structure refinements for **1a–3b**

| Compound                                                         | <b>1a</b>                                                                       | <b>1b</b>                                                                      | <b>2a</b>                                                         | <b>2b</b>                                                         | <b>3a</b>                                                         | <b>3b</b>                                                         |
|------------------------------------------------------------------|---------------------------------------------------------------------------------|--------------------------------------------------------------------------------|-------------------------------------------------------------------|-------------------------------------------------------------------|-------------------------------------------------------------------|-------------------------------------------------------------------|
| Formula                                                          | C <sub>26</sub> H <sub>28</sub> CdN <sub>8</sub> O <sub>12</sub> S <sub>2</sub> | C <sub>26</sub> H <sub>22</sub> CdN <sub>8</sub> O <sub>8</sub> S <sub>2</sub> | C <sub>16</sub> H <sub>16</sub> CdN <sub>4</sub> O <sub>4</sub> S | C <sub>16</sub> H <sub>18</sub> CdN <sub>4</sub> O <sub>5</sub> S | C <sub>17</sub> H <sub>13</sub> CdN <sub>5</sub> O <sub>5</sub> S | C <sub>17</sub> H <sub>13</sub> CdN <sub>5</sub> O <sub>5</sub> S |
| <i>M<sub>r</sub></i>                                             | 821.08                                                                          | 751.04                                                                         | 472.79                                                            | 490.80                                                            | 511.78                                                            | 510.78                                                            |
| <i>T</i> (K)                                                     | 293(2)                                                                          | 293(2)                                                                         | 293(2)                                                            | 293(2)                                                            | 293(2)                                                            | 293(2)                                                            |
| Crystal system                                                   | triclinic                                                                       | monoclinic                                                                     | monoclinic                                                        | monoclinic                                                        | Tetragonal                                                        | Tetragonal                                                        |
| Space group                                                      | <i>P</i> -1                                                                     | <i>C</i> 2/ <i>c</i>                                                           | <i>C</i> 2/ <i>c</i>                                              | <i>C</i> 2/ <i>c</i>                                              | <i>I</i> -42 <i>d</i>                                             | <i>I</i> -42 <i>d</i>                                             |
| <i>a</i> (Å)                                                     | 8.768(2)                                                                        | 21.534(6)                                                                      | 15.539(3)                                                         | 16.714(6)                                                         | 9.4730(11)                                                        | 9.4643(12)                                                        |
| <i>b</i> (Å)                                                     | 8.851(2)                                                                        | 8.764(3)                                                                       | 8.9486(15)                                                        | 16.289(6)                                                         | 9.4730(11)                                                        | 9.4643(12)                                                        |
| <i>c</i> (Å)                                                     | 12.344(3)                                                                       | 16.832(5)                                                                      | 13.056(2)                                                         | 13.976(5)                                                         | 42.894(10)                                                        | 42.890(11)                                                        |
| <i>α</i> (°)                                                     | 76.950(2)                                                                       | 90.00                                                                          | 90.00                                                             | 90.00                                                             | 90                                                                | 90                                                                |
| <i>β</i> (°)                                                     | 77.453(2)                                                                       | 106.950(4)                                                                     | 103.428(2)                                                        | 95.587(3)                                                         | 90                                                                | 90                                                                |
| <i>γ</i> (°)                                                     | 63.795(2)                                                                       | 90.00                                                                          | 90.00                                                             | 90.00                                                             | 90                                                                | 90                                                                |
| <i>V</i> (Å <sup>3</sup> )                                       | 829.7(3)                                                                        | 3038.6(15)                                                                     | 1765.9(5)                                                         | 3787(2)                                                           | 3849.2(11)                                                        | 3841.8(12)                                                        |
| <i>Z</i>                                                         | 1                                                                               | 4                                                                              | 4                                                                 | 8                                                                 | 8                                                                 | 8                                                                 |
| <i>ρ</i> (g cm <sup>-3</sup> )                                   | 1.643                                                                           | 1.642                                                                          | 1.778                                                             | 1.722                                                             | 1.766                                                             | 1.766                                                             |
| <i>μ</i> (mm <sup>-1</sup> )                                     | 0.857                                                                           | 0.918                                                                          | 1.385                                                             | 1.299                                                             | 1.284                                                             | 1.286                                                             |
| <i>F</i> (000)                                                   | 416                                                                             | 1512                                                                           | 944                                                               | 1968                                                              | 2032                                                              | 2024                                                              |
| GOF ( <i>F</i> <sup>2</sup> )                                    | 1.034                                                                           | 1.031                                                                          | 1.033                                                             | 1.037                                                             | 1.253                                                             | 1.107                                                             |
| <i>R</i> <sub>1</sub> <sup>a</sup> [ <i>I</i> > 2σ( <i>I</i> )]  | 0.0285                                                                          | 0.0447                                                                         | 0.0196                                                            | 0.0516                                                            | 0.0330                                                            | 0.0367                                                            |
| <i>wR</i> <sub>2</sub> <sup>b</sup> [ <i>I</i> > 2σ( <i>I</i> )] | 0.0716                                                                          | 0.1288                                                                         | 0.0492                                                            | 0.1329                                                            | 0.0890                                                            | 0.0962                                                            |

<sup>a</sup>  $R_1 = \sum ||F_o| - |F_c|| / \sum |F_o|$ ; <sup>b</sup>  $wR_2 = \{ \sum [w(F_o^2 - F_c^2)^2] / \sum [w(F_o^2)^2] \}^{1/2}$

**Tables S2** Selected Bond Distances (Å) and Angles (deg) for Complexes **1a–3b**

| Compound <b>1a</b> <sup>a</sup>                                                                                                                                                                      |            |                   |            |                    |            |
|------------------------------------------------------------------------------------------------------------------------------------------------------------------------------------------------------|------------|-------------------|------------|--------------------|------------|
| Cd(1)–O(1)                                                                                                                                                                                           | 2.3584(19) | Cd(1)–N(1)        | 2.328(2)   | Cd(1)–N(4)#2       | 2.325(2)   |
| N(4)#2–Cd(1)–N(4)#3                                                                                                                                                                                  | 180.0      | N(4)#2–Cd(1)–N(1) | 91.83(7)   | N(4)#3–Cd(1)–N(1)  | 88.17(7)   |
| N(1)–Cd(1)–N(1)#4                                                                                                                                                                                    | 180.00(11) | N(4)#2–Cd(1)–O(1) | 90.61(7)   | N(4)#3–Cd(1)–O(1)  | 89.39(7)   |
| N(1)–Cd(1)–O(1)                                                                                                                                                                                      | 91.61(7)   | N(1)#4–Cd(1)–O(1) | 88.39(7)   | O(1)–Cd(1)–O(1) #4 | 180.0      |
| <sup>a</sup> Symmetry codes: #1 <i>x</i> +1, <i>y</i> -1, <i>z</i> #2 <i>x</i> -1, <i>y</i> +1, <i>z</i> #3 - <i>x</i> +1, - <i>y</i> +1, - <i>z</i> +1 #4 - <i>x</i> , - <i>y</i> +2, - <i>z</i> +1 |            |                   |            |                    |            |
| Compound <b>1b</b> <sup>b</sup>                                                                                                                                                                      |            |                   |            |                    |            |
| Cd(1)–O(1)                                                                                                                                                                                           | 2.354(3)   | Cd(1)–N(1)        | 2.338(4)   | Cd(1)–N(4)#1       | 2.289(4)   |
| N(4)#1–Cd(1)–N(4)#2                                                                                                                                                                                  | 180.000(1) | N(4)#1–Cd(1)–N(1) | 87.21(15)  | N(4)#2–Cd(1)–N(1)  | 92.79(15)  |
| N(1)–Cd(1)–N(1)#3                                                                                                                                                                                    | 180.0      | N(1)–Cd(1)–O(1)#3 | 95.43(15)  | N(4)#1–Cd(1)–O(1)  | 88.66(16)  |
| N(4)#2–Cd(1)–O(1)                                                                                                                                                                                    | 91.34(16)  | N(1)–Cd(1)–O(1)   | 84.57(15)  | N(1)#3–Cd(1)–O(1)  | 84.57(15)  |
| O(1)#3–Cd(1)–O(1)                                                                                                                                                                                    | 180.00(9)  |                   |            |                    |            |
| <sup>b</sup> Symmetry codes: #1 - <i>x</i> +1/2, - <i>y</i> +1/2, - <i>z</i> +1 #2 <i>x</i> , <i>y</i> -1, <i>z</i> #3 - <i>x</i> +1/2, - <i>y</i> -1/2, - <i>z</i> +1                               |            |                   |            |                    |            |
| Compound <b>2a</b> <sup>c</sup>                                                                                                                                                                      |            |                   |            |                    |            |
| Cd(1)–N(2)                                                                                                                                                                                           | 2.2547(16) | Cd(1)–O(2)        | 2.3914(14) | Cd(1)–O(1)         | 2.3986(13) |
| N(2)#1–Cd(1)–N(2)                                                                                                                                                                                    | 180.00(13) | N(2)–Cd(1)–O(2)#1 | 89.62(6)   | N(2)–Cd(1)–O(2)    | 90.38(6)   |
| O(2)#1–Cd(1)–O(2)                                                                                                                                                                                    | 180.00(7)  | N(2)–Cd(1)–O(1)   | 88.98(5)   | O(2)–Cd(1)–O(1)    | 55.08(4)   |
| N(2)–Cd(1)–O(1)#1                                                                                                                                                                                    | 91.02(5)   | O(2)–Cd(1)–O(1)#1 | 124.92(4)  | O(1)–Cd(1)–O(1)#1  | 180.00(8)  |
| <sup>c</sup> Symmetry codes: #1 - <i>x</i> +1, - <i>y</i> , - <i>z</i>                                                                                                                               |            |                   |            |                    |            |
| Compound <b>2b</b> <sup>d</sup>                                                                                                                                                                      |            |                   |            |                    |            |
| Cd(1)–O(1)                                                                                                                                                                                           | 2.215(5)   | Cd(1)–N(1)        | 2.251(5)   | Cd(1)–O(2)         | 2.642(5)   |

|                     |           |                     |            |                   |            |
|---------------------|-----------|---------------------|------------|-------------------|------------|
| Cd(1)–O(3)#2        | 2.462(6)  | Cd(1)–O(4)#2        | 2.401(5)   | Cd(1)–N(4)#1      | 2.233(6)   |
| O(1)–Cd(1)–N(4)#1   | 123.1(2)  | O(1)–Cd(1)–N(1)     | 119.7(2)   | N(4)#1–Cd(1)–N(1) | 100.8(2)   |
| O(1)–Cd(1)–O(4)#2   | 95.80(19) | N(4)#1–Cd(1)–O(4)#2 | 124.7(2)   | N(1)–Cd(1)–O(4)#2 | 89.29(19)  |
| O(1)–Cd(1)–O(3)#2   | 91.74(19) | N(4)#1–Cd(1)–O(3)#2 | 84.70(19)  | N(1)–Cd(1)–O(3)#2 | 135.0(2)   |
| O(4)#2–Cd(1)–O(3)#2 | 53.72(19) | O(1)–Cd(1)–O(2)     | 53.23(16)  | N(4)#1–Cd(1)–O(2) | 92.95(19)  |
| N(1)–Cd(1)–O(2)     | 89.03(17) | O(4)#2–Cd(1)–O(2)   | 141.92(18) | O(3)#2–Cd(1)–O(2) | 135.68(18) |

<sup>d</sup>Symmetry codes: #1  $-x+3/2, -y+1/2, -z+1$  #2  $-x+1/2, -y+1/2, -z+1$

Compound **3a<sup>e</sup>**

|                     |            |                    |            |                     |            |
|---------------------|------------|--------------------|------------|---------------------|------------|
| Cd(1)–O(1)#1        | 2.342(4)   | Cd(1)–O(1)         | 2.342(4)   | Cd(1)–N(3)#2        | 2.345(4)   |
| Cd(1)–N(3)#3        | 2.345(4)   | Cd(1)–N(1)         | 2.439(5)   | Cd(1)–O(2)          | 2.517(4)   |
| Cd(1)–O(2)#1        | 2.517(4)   |                    |            |                     |            |
| O(1)#1–Cd(1)–O(1)   | 83.76(19)  | O(1)#–Cd(1)–N(3)#2 | 89.88(15)  | O(1)–Cd(1)–N(3)#2   | 99.91(14)  |
| O(1)#1–Cd(1)–N(3)#3 | 99.91(14)  | O(1)–Cd(1)–N(3)#3  | 89.88(15)  | N(3)#2–Cd(1)–N(3)#3 | 166.9(2)   |
| O(1)#1–Cd(1)–N(1)   | 138.12(10) | O(1)–Cd(1)–N(1)    | 138.12(10) | N(3)#2–Cd(1)–N(1)   | 83.45(10)  |
| N(3)#3–Cd(1)–N(1)   | 83.45(10)  | O(1)#1–Cd(1)–O(2)  | 136.88(13) | O(1)–Cd(1)–O(2)     | 53.66(13)  |
| N(3)#2–Cd(1)–O(2)   | 91.11(15)  | N(3)#3–Cd(1)–O(2)  | 87.69(15)  | N(1)–Cd(1)–O(2)     | 84.71(9)   |
| O(1)#1–Cd(1)–O(2)#1 | 53.66(13)  | O(1)–Cd(1)–O(2)#1  | 136.88(13) | N(3)#2–Cd(1)–O(2)#1 | 87.69(15)  |
| N(3)#3–Cd(1)–O(2)#1 | 91.11(15)  | N(1)–Cd(1)–O(2)#1  | 84.71(9)   | O(2)–Cd(1)–O(2)#1   | 169.42(17) |

<sup>e</sup>Symmetry codes: #1  $-x, -y+2, z$  #2  $-x+1/2, y-1/2, -z+3/2$  #3  $-y+1/2, x+3/2, -z+3/2$

Compound **3b<sup>f</sup>**

|               |            |               |            |               |            |
|---------------|------------|---------------|------------|---------------|------------|
| Cd1–O1#1      | 2.329(4)   | Cd1–O1        | 2.329(4)   | Cd1–N3#2      | 2.338(5)   |
| Cd1–N3#3      | 2.338(5)   | Cd1–N1        | 2.426(5)   | Cd1–O2        | 2.562(6)   |
| Cd1–O2#1      | 2.562(6)   |               |            |               |            |
| O1#1–Cd1–O1   | 83.8(2)    | O1#1–Cd1–N3#2 | 88.68(17)  | O1–Cd1–N3#2   | 100.31(17) |
| O1#1–Cd1–N3#3 | 100.31(17) | O1–Cd1–N3#3   | 88.68(17)  | N3#2–Cd1–N3#3 | 168.0(2)   |
| O1#1–Cd1–N1   | 138.09(11) | O1–Cd1–N1     | 138.09(11) | N3#2–Cd1–N1   | 83.99(12)  |
| N3#3–Cd1–N1   | 83.99(12)  | O1#1–Cd1–O2   | 135.68(15) | O1–Cd1–O2     | 52.81(15)  |
| N3#2–Cd1–O2   | 90.5(2)    | N3#3–Cd1–O2   | 88.6(2)    | N1–Cd1–O2     | 85.72(11)  |
| O1#1–Cd1–O2#1 | 52.81(15)  | O1–Cd1–O2#1   | 135.68(15) | N3#2–Cd1–O2#1 | 88.6(2)    |
| N3#3–Cd1–O2#1 | 90.5(2)    | N1–Cd1–O2#1   | 85.72(11)  | O2–Cd1–O2#1   | 171.4(2)   |

<sup>f</sup>Symmetry codes: #1  $-x, -y+2, z$  #2  $y-1/2, -x+1/2, -z+3/2$  #3  $-y+1/2, x+3/2, -z+3/2$

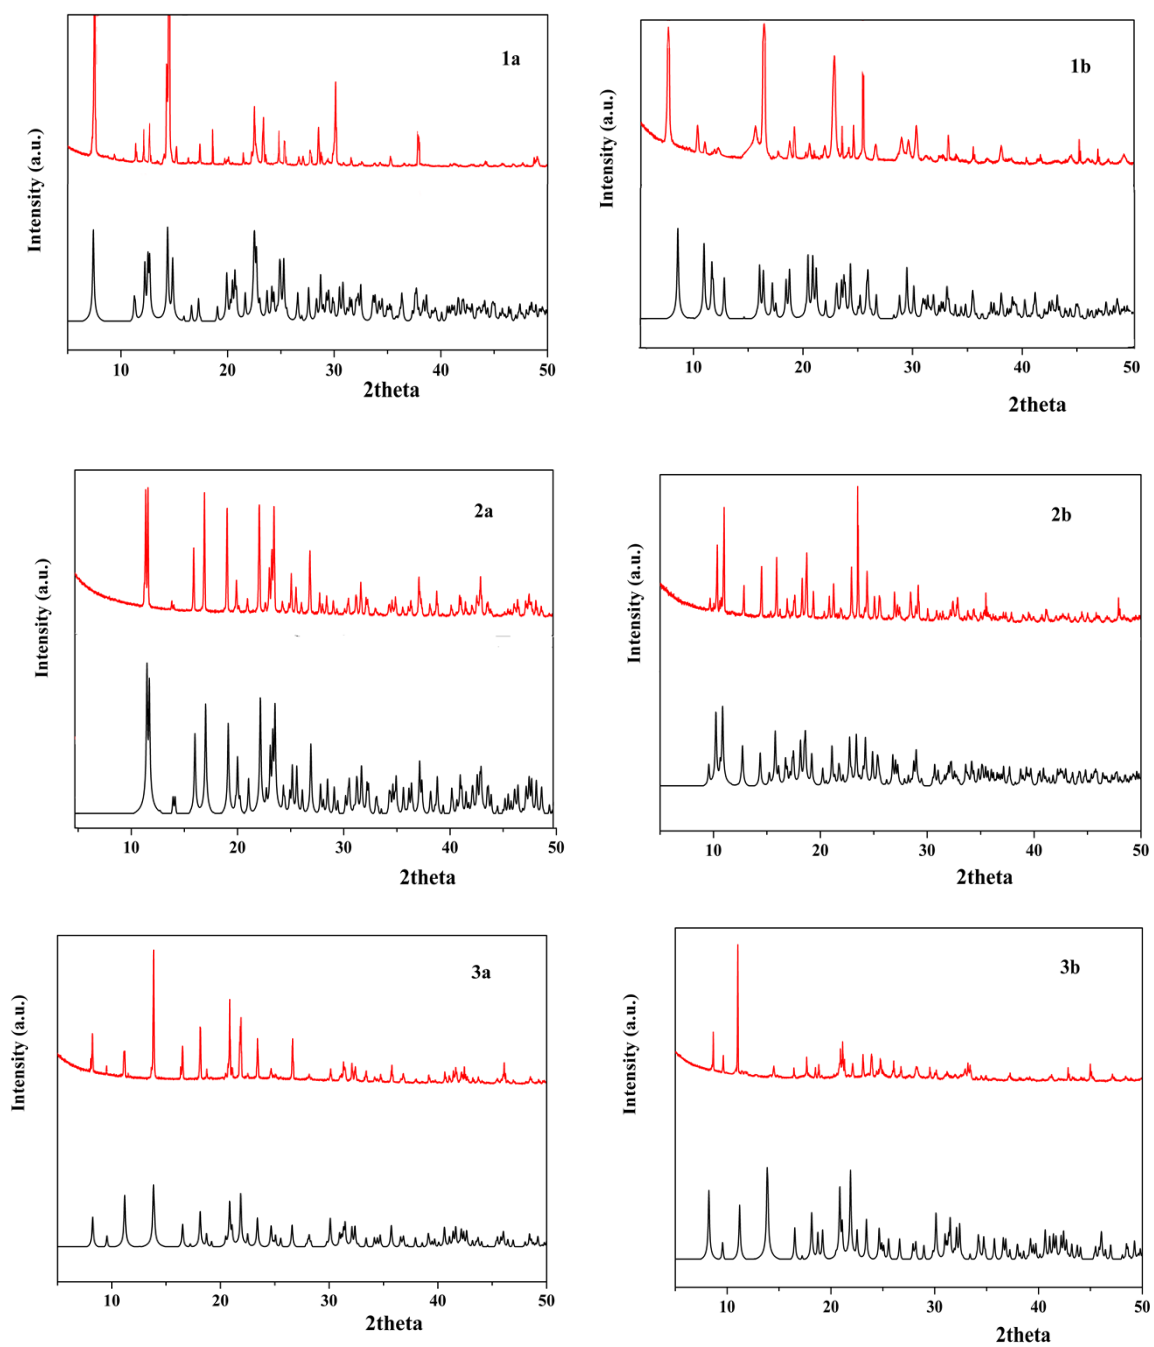

**Fig. S1** PXR D patterns of **1a–3b** simulated from X-ray single-crystal diffraction data (bottom) and experimental data (upper).

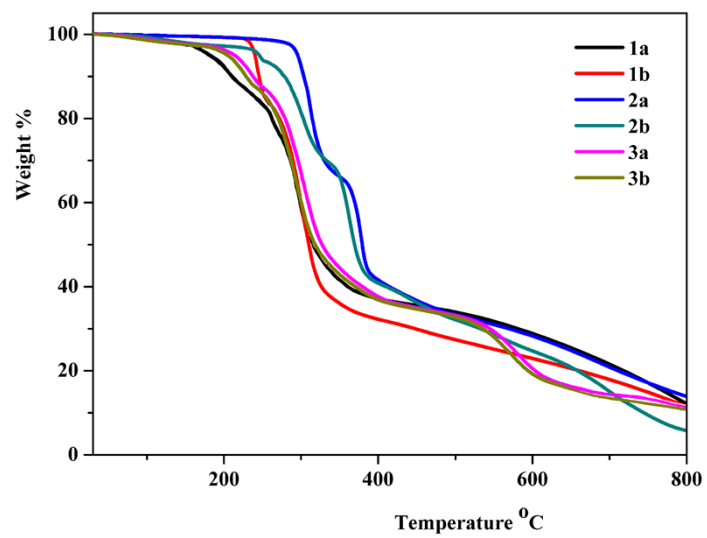

Fig. S2 TGA curves for complexes 1a–3b.
